# Supplementary material for: Carbonyl copper(i) complexes with hydrotris(1,2,4-triazolyl)borate, hydrotris(pyrazolyl)borate, and tris(pyrazolyl)methaneligands: a DFT study
Source: Royal Society of Chemistry journal article supplement (doi:10.1039/b815095h), 2008-11-19
Supplement: b815095h.pdf [file b815095h.pdf]

Table S1. Optimized Coordinates of [Cu(ttz)(CO)]

|    |           |           |           |
|----|-----------|-----------|-----------|
| C  | -0.058176 | -4.684176 | -0.363459 |
| O  | -0.082520 | -5.832225 | -0.438827 |
| C  | -0.842015 | -1.466849 | -3.076043 |
| C  | -0.716594 | 0.550926  | -2.514451 |
| C  | -1.863567 | 0.217822  | 1.884372  |
| C  | -2.174514 | -1.852903 | 2.018929  |
| C  | 2.564940  | 0.264549  | 0.678477  |
| C  | 2.942609  | -1.798475 | 0.622522  |
| H  | 2.646964  | 1.342079  | 0.780120  |
| H  | -0.991924 | -2.372604 | -3.654548 |
| H  | -0.731678 | 1.636349  | -2.495546 |
| H  | -2.555262 | -2.825190 | 2.314347  |
| H  | -1.906846 | 1.294597  | 2.015549  |
| H  | 0.015930  | 1.429061  | 0.104038  |
| B  | 0.004725  | 0.231929  | 0.010828  |
| Cu | -0.027593 | -2.873920 | -0.233973 |
| N  | -1.006231 | -0.214978 | -3.569104 |
| N  | -2.603238 | -0.678225 | 2.542198  |
| N  | 3.552511  | -0.613511 | 0.869461  |
| H  | 3.439308  | -2.761536 | 0.680037  |
| N  | -0.472351 | -1.505984 | -1.793276 |
| N  | -0.390539 | -0.183474 | -1.429499 |
| N  | -1.023740 | -0.367237 | 1.003795  |
| N  | -1.225070 | -1.723685 | 1.088711  |
| N  | 1.408609  | -0.340959 | 0.332811  |
| N  | 1.652273  | -1.692509 | 0.295275  |

Table S2. Optimized Coordinates of [Cu(tp)(CO)]

|    |           |           |           |
|----|-----------|-----------|-----------|
| C  | -0.001653 | -4.679791 | 0.006850  |
| O  | -0.000919 | -5.833172 | 0.014842  |
| C  | -1.530551 | -1.778434 | -2.650431 |
| C  | -1.845283 | -0.515958 | -3.183628 |
| C  | -1.317262 | 0.389890  | -2.269812 |
| C  | -1.314396 | 0.389283  | 2.271918  |
| C  | -1.843720 | -0.516596 | 3.185015  |
| C  | -1.535102 | -1.778966 | 2.648265  |
| C  | 2.623835  | 0.390226  | 0.007439  |
| C  | 3.679661  | -0.515161 | 0.012692  |
| C  | 3.061145  | -1.777792 | 0.010122  |
| H  | 3.510206  | -2.765669 | 0.013600  |
| H  | 4.740869  | -0.291646 | 0.018557  |
| H  | 2.617138  | 1.474920  | 0.008208  |
| H  | -1.753893 | -2.766498 | -3.039748 |
| H  | -2.379704 | -0.293028 | -4.100613 |
| H  | -1.317404 | 1.474635  | -2.261766 |
| H  | -1.761334 | -2.766933 | 3.035927  |
| H  | -2.375254 | -0.293750 | 4.103676  |
| H  | -1.310112 | 1.473971  | 2.265989  |
| H  | 0.000817  | 1.413939  | 0.001214  |
| B  | -0.000933 | 0.212584  | 0.000118  |
| Cu | 0.000190  | -2.870256 | 0.000887  |
| N  | 1.724903  | -1.648876 | 0.003597  |
| N  | -0.859419 | -1.649036 | -1.495012 |
| N  | -0.730490 | -0.308559 | -1.265440 |
| N  | -0.731922 | -0.309460 | 1.264917  |
| N  | -0.865326 | -1.649694 | 1.492040  |
| N  | 1.460767  | -0.308649 | 0.001725  |

Table S3. Optimized Coordinates of [Cu(tpm)(CO)]+

|   |           |           |           |
|---|-----------|-----------|-----------|
| C | -0.003804 | -4.785840 | 0.008277  |
| O | -0.007082 | -5.931333 | 0.019663  |
| C | -1.515126 | -1.701345 | -2.625848 |
| C | -1.802456 | -0.407973 | -3.109770 |
| C | -1.264340 | 0.456882  | -2.177346 |
| C | -0.000943 | 0.113692  | 0.000482  |
